# Supplementary material for: Role of Earth system processes in carbon emissions budgets
Source: Research Square preprint supplement (doi:10.21203/rs.3.rs-6812102/v1), 2025-06-20
Supplement: Supplementary file 1 [file 7551cf2ca861aeb763bf1d16.docx]

Supplementary Information for

**Role of Earth system processes in carbon emissions budgets**

Spencer K. Liddicoat*, Chris D. Jones, Lina M. Mercado, Eddy Robertson,

Stephen Sitch, Andy Wiltshire

*Corresponding author: spencer.liddicoat@metoffice.gov.uk


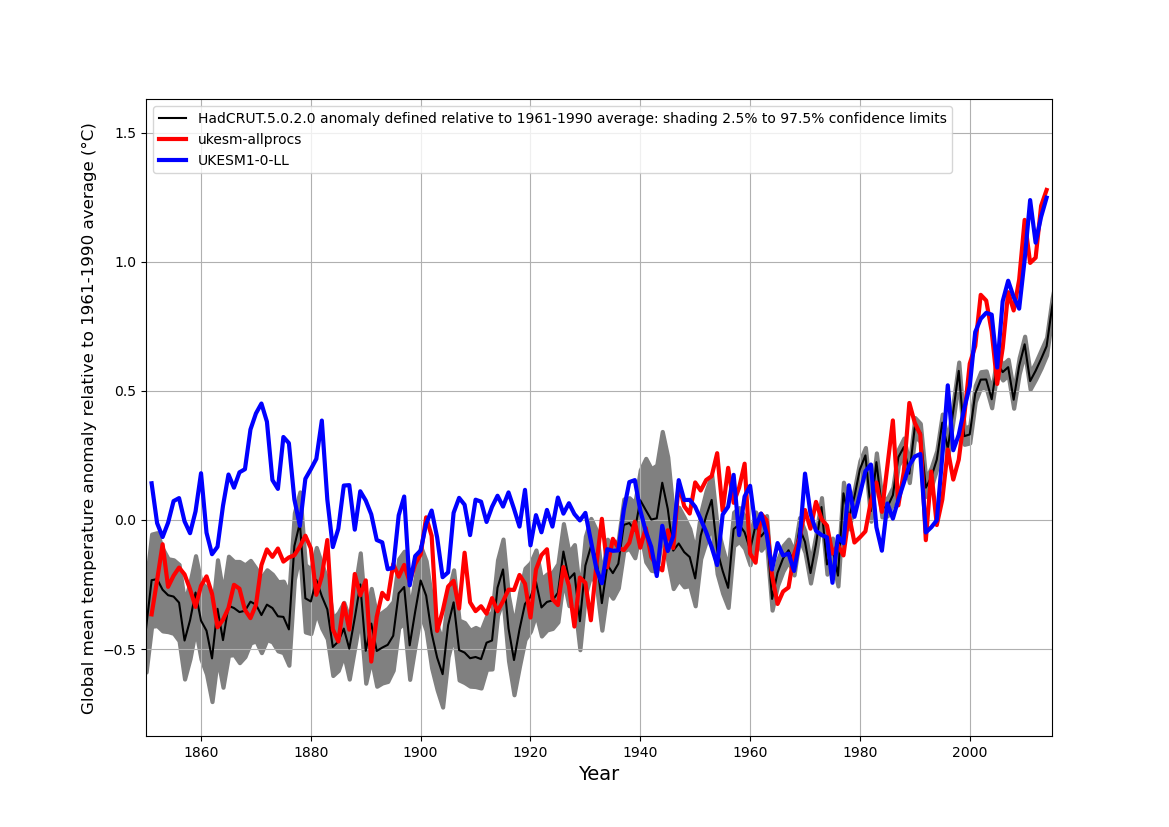


**Fig. S1: Global mean temperature anomaly relative to 1961-1990 average.** Emissions-driven historical simulation with *ukesm-allprocs* configuration (red curve) and UKESM1-0-LL (blue curve), with observations-based values from HadCRUT5.0.2.0 (black curve, 2.5% to 97.5% confidence interval is shaded).

**
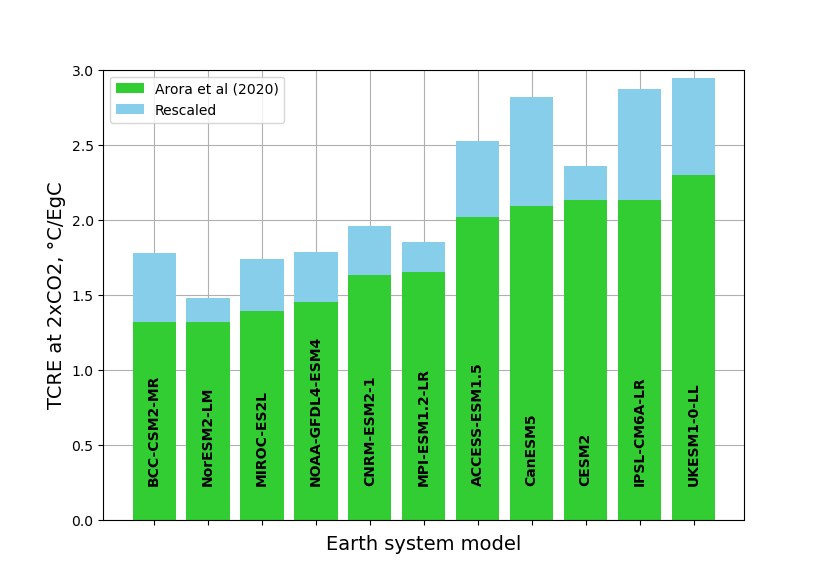
**

Fig. S2: Bar chart of the original TCRE (green bars) from (*11*), and the increase (blue bars) after rescaling to account for absent processes, for 11 CMIP6 ESMs.


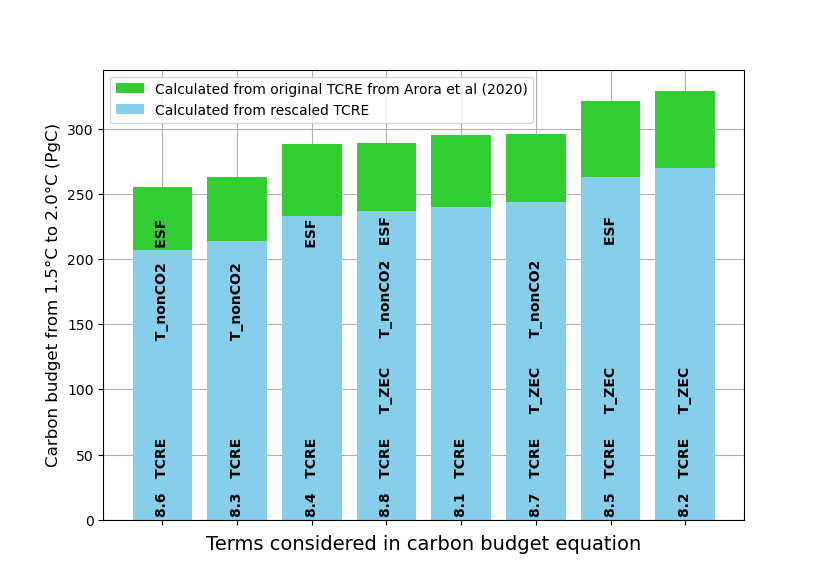


**Fig. S3: Bar chart showing the average carbon budget from 1.5°C to 2°C of 11 CMIP6 ESMs.** Calculated from equations 8.1 to 8.8, using the original TCRE from (*11*) (green bars) and the TCRE rescaled to account for missing processes (blue bars). Bar labels show equation number and the adjustment terms included in the calculation of the carbon budget: T_nonCO2 = warming due to non-CO2 forcing, T_ZEC is zero emissions commitment (ZEC25) from (*21*) where available; ESF is emissions due to Earth system feedbacks not accounted for in the calculation of TCRE.

| Configuration | TCRE (°C/EgC) | Cumulative Emissions (PgC) |
| --- | --- | --- |
| *ukesm-ctrl* | 2.478 | 1077 |
| *ukesm-nonlim* | 2.258 | 1180 |
| *ukesm-bvoc* | 2.442 | 1085 |
| *ukesm-nodgvm* | 2.516 | 1021 |
| *ukesm-wch4* | 2.603 | 1076 |
| *ukesm-df* | 2.688 | 1060 |
| *ukesm-fire* | 2.839 | 962 |
| *ukesm-allprocs* | 3.131 | 952 |
| UKESM1-0-LL | 2.300 | 1054 |

**Table S1: TCRE and cumulative emissions to the point of doubling of CO2** in the 8 UKESM configurations from this study and the CMIP6 version, UKESM1-0-LL**.**

|  | Nitrogen limitation | Dynamic vegetation | Fire-vegetation interactions | Interactive BVOC emissions | Interactive CH4 cycle and emissions from wetlands | Interactive diffuse fraction of PAR | Overall scaling factor for each ESM | |
| --- | --- | --- | --- | --- | --- | --- | --- | --- |
| TCRE | CE |
| ACCESS-ESM1.5 | Yes | No | No | No | No | No | 1.251 | 0.939 |
| BCC-CSM2-MR | No | No | No | No | No | No | 1.348 | 0.853 |
| CanESM5 | No | No | No | No | No | No | 1.348 | 0.853 |
| CESM2 | Yes | No | Yes | No | No | No | 1.105 | 1.046 |
| CNRM-ESM2-1 | No | No | Yes | No | No | No | 1.203 | 0.959 |
| GFDL-ESM4 | No | Yes | Yes | Yes | No | No | 1.233 | 0.896 |
| IPSL-CM6A-LR | No | No | No | No | No | No | 1.348 | 0.853 |
| MIROC-ES2L | Yes | No | No | No | No | No | 1.251 | 0.939 |
| MPI-ESM1.2-LR | Yes | Yes | Yes | No | No | No | 1.121 | 0.991 |
| NorESM2-LM | Yes | No | Yes | Yes | No | No | 1.120 | 1.038 |
| UKESM1-0-LL | Yes | Yes | No | Yes | No | No | 1.281 | 0.876 |
| *ukesm-ctrl* | Yes | Yes | No | No | No | No | 1.267 | 0.884 |

**Table S2: ESM-specific scaling factors and the processes included (Yes) or not (No) in each model.** The final column contains the scaling factors by which the original TCRE and Cumulative Emissions from (*11*) are multiplied to account for the processes not represented in each model as shown in columns 2 to 7. Included are 11 CMIP6 models, and the control configuration of the ukesm process ensemble, *ukesm-ctrl.*

| Earth System Model | TCRE (K/EgC) | Rescaled TCRE (K/EgC) | Cumulative Emissions (PgC) | Rescaled Cumulative Emissions (PgC) |
| --- | --- | --- | --- | --- |
| BCC-CSM2-MR | 1.32 | 1.78 | 1291 | 1101 |
| NorESM2-LM | 1.32 | 1.48 | 1075 | 1116 |
| MIROC-ES2L | 1.39 | 1.74 | 1135 | 1066 |
| GFDL4-ESM4 | 1.45 | 1.79 | 1066 | 955 |
| CNRM-ESM2-1 | 1.63 | 1.96 | 1124 | 1078 |
| MPI-ESM1.2-LR | 1.65 | 1.85 | 1127 | 1117 |
| ACCESS-ESM1.5 | 2.02 | 2.53 | 1064 | 1000 |
| CanESM5 | 2.09 | 2.82 | 1214 | 1035 |
| CESM2 | 2.13 | 2.35 | 1073 | 1122 |
| IPSL-CM6A-LR | 2.13 | 2.87 | 1107 | 944 |
| UKESM1-0-LL | 2.30 | 2.95 | 1054 | 924 |
| CMIP6 Mean ± Std Dev | 1.77 ± 0.36 | 2.19 ± 0.50 | 1121 ± 70 | 1042 ± 71 |
| *ukesm-allprocs,* this study | **3.13** | **-** | **952** | **-** |
| *ukesm-ctrl,* this study | 2.48 | **3.14** | 1077 | **952** |

**Table S3:** **Table of original and rescaled TCRE and cumulative emissions for 11 CMIP6 ESMs.** The last two rows show the same figures, where applicable, for the control (*ukesm-ctrl*) and ‘all processes’ (*ukesm-allprocs*) configurations of UKESM from this study. The rescaled *ukesm-ctrl* values of TCRE and CE, and the TCRE and CE from *ukesm-allprocs* they are intended to reconstruct, are both highlighted in bold.

| Equation used to calculate carbon budget from 1.5°C to 2°C | *CB1.5_2.0* using TCRE from Arora et al (2020) (PgC) | *CB1.5_2.0* using rescaled TCRE (PgC) | Reduction in CB on using rescaled TCRE (%) |
| --- | --- | --- | --- |
| *CB1.5_2.0 = (2.0°C -1.5°C)/TCRE* | 295 | 240 | 18.6 |
| *CB1.5_2.0 = (2.0°C -1.5°C - TZEC)/TCRE* | 329 | 270 | 17.7 |
| *CB1.5_2.0 = (2.0°C -1.5°C - TnonCO2)/TCRE* | 263 | 214 | 18.6 |
| *CB1.5_2.0 = (2.0°C -1.5°C)/TCRE – ESF* | 288 | 233 | 19.0 |
| *CB1.5_2.0 = (2.0°C -1.5°C -TZEC)/TCRE – ESF* | 321 | 263 | 18.1 |
| *CB1.5_2.0 = (2.0°C -1.5°C - TnonCO2)/TCRE – ESF* | 255 | 207 | 19.1 |
| *CB1.5_2.0 = (2.0°C -1.5°C - TnonCO2 -TZEC)/TCRE* | 296 | 244 | 17.6 |
| *CB1.5_2.0 = (2.0°C -1.5°C - TnonCO2 -TZEC)/TCRE -ESF* | 289 | 237 | 18.1 |
| *Mean and standard deviation* | 292±24 | 238±20 | 18.4±0.5 |

**Table S4:** Carbon emissions budget from 1.5°C to 2°C calculated from the original TCRE of the 11 CMIP6 ESMs reported in (*11*), before and after rescaling to account for the processes absent from each model, as calculated by the equations shown in column 1. CB1.5_2.0 is the carbon budget from 1.5°C to 2°C, TZEC is the committed warming evaluated 25 years after the cessation of CO2 emissions, TnonCO2 is the estimated warming due to non-CO2 forcing, and ESF is an estimate of the CO2 released due to feedbacks unaccounted for in the calculation of TCRE. See Methods for details.
